# Supplementary material for: One-step electrochemical fabrication of a nickel oxide nanoparticle/polyaniline nanowire/graphene oxide hybrid on a glassy carbon electrode for use as a non-enzymatic glucose biosensor
Source: Royal Society of Chemistry journal article supplement (doi:10.1039/c6ra14970g), 2016-01-01
Supplement: c6ra14970g1.pdf [file c6ra14970g1.pdf]

*Supporting information*

**One-step Electrochemical Fabrication of Nickel Oxide  
Nanoparticles/Polyaniline Nanowire/Graphene Oxide Hybrids on  
Glassy Carbon Electrode for a Non-enzymatic Glucose Biosensor**

Xuming Zhuang<sup>a</sup>, Chunyuan Tian<sup>a</sup>, Feng Luan<sup>a</sup>, Xuran Wu<sup>\*a</sup>, Lingxin Chen<sup>\*a,b</sup>

*<sup>a</sup>College of Chemistry and Chemical Engineering, Yantai University, China.*

*<sup>b</sup>Key Laboratory of Coastal Environmental Processes and Ecological Remediation,  
Yantai Institute of Coastal Zone Research, Chinese Academy of Sciences, China.*

---

\*Corresponding author:

Prof. Xuran Wu; E-mail: ytdxwxr@126.com

Prof. Lingxin Chen; Tel.: +86 535 2109130; Fax: +86 535 2109130.

E-mail: lxchen@yic.ac.cn.

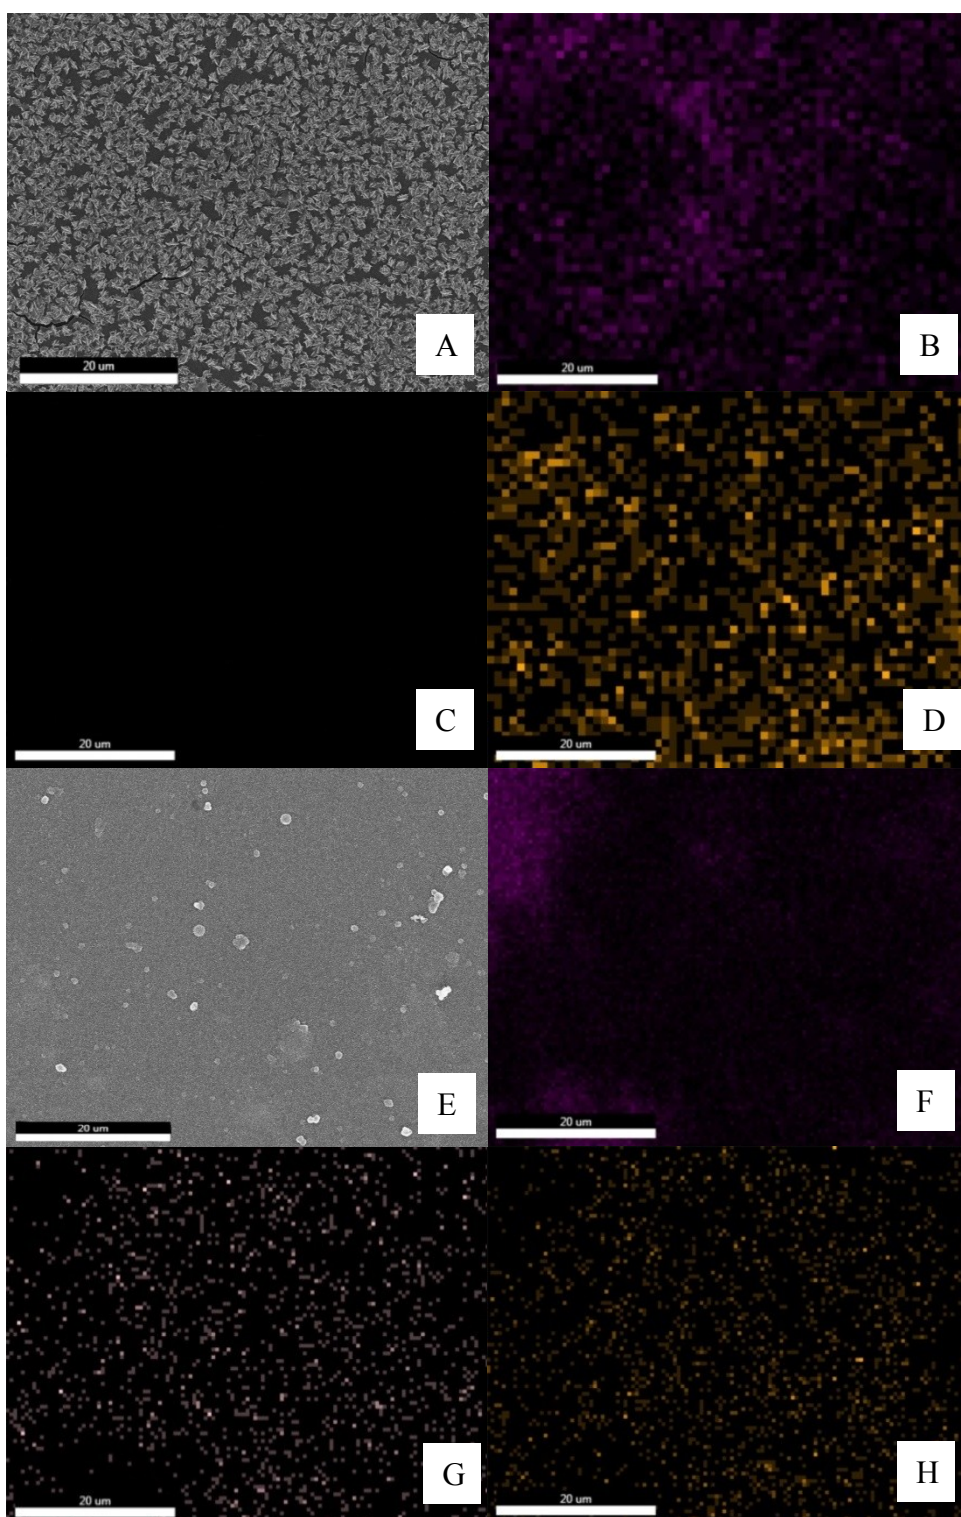

**Fig.S1** The SEM images (A, E) and element mapping of C (B, F), N (C, G), Ni (D, H), for NiONS/GO/GCE (A, B, C, D), and NiONPs/PANiNW/GO/GCE (E, F, G, H).

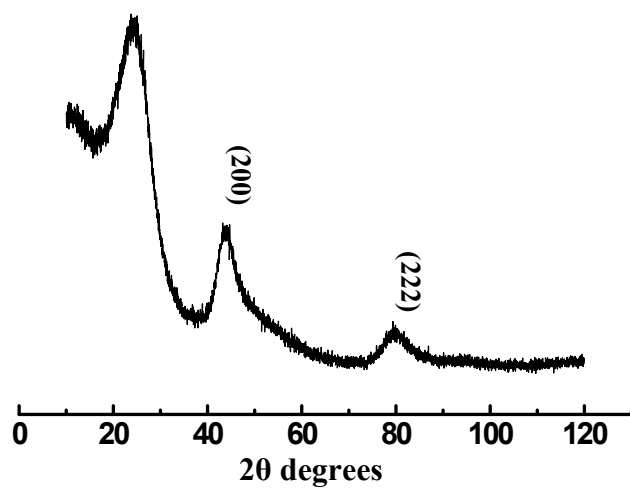

**Fig. S2.** XRD pattern for NiONPs/PANiNW/GO/GCE.

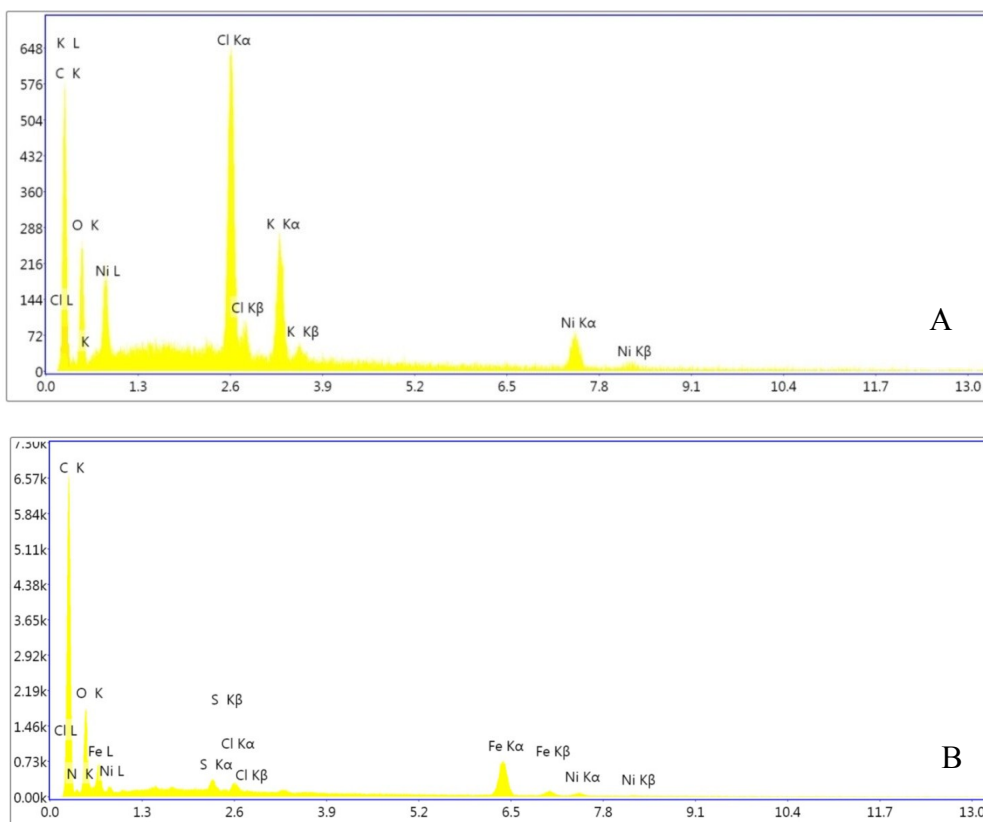

**Fig. S3.** EDX spectra of NiONS/GO/GCE (A), and NiONPs/PANiNW/GO/GCE (B), and the SEM images were same as Fig. S1 A and E.
